# Supplementary material
Source: ML conference proceedings conference paper supplement (https://proceedings.neurips.cc/paper_files/paper/2023/hash/170035f97007fdfa665880107b56f384-Abstract.html)
Supplement: Supplementary file 1 [file 170035f97007fdfa665880107b56f384-Supplemental-Datasets_and_Benchmarks.pdf]

## 498 **A Project webpage**

499 We provide a project webpage for the dataset that can be found here: [https://thoranna.github.io/learning\\_to\\_taste/](https://thoranna.github.io/learning_to_taste/), which contains a link to the dataset and the code to reproduce our  
500 experiments. Additionally, we provide more examples from our dataset and images from the data  
501 collection.  
502

## 503 **B The WineSensed file structure**

504 Our dataset is currently available here: [https://data.dtu.dk/articles/dataset/WineSensed\\_Learning\\_to\\_Taste\\_A\\_Multimodal\\_Wine\\_Dataset/23376560](https://data.dtu.dk/articles/dataset/WineSensed_Learning_to_Taste_A_Multimodal_Wine_Dataset/23376560). The dataset will  
505 be maintained on this site, which is hosted on a server run by the Technical University of Denmark.  
506

507 WineSensed contains a metadata.zip file consisting of the files participants.csv,  
508 which contains information connecting participants to annotations in the experiment,  
509 images\_reviews\_attributes.csv, which contains reviews, links to images, and wine attributes,  
510 and napping.csv, which contains the coordinates of each wine on the napping paper, alongside  
511 information connecting each coordinate pair to the wines being annotated and the participant that  
512 annotated them. The chunk\_<chunk num>.zip folders contain the images of the wines in the  
513 dataset in .jpg format.

514 napping.csv contains the following fields:

- 515 • session\_round\_name: session number during the event\_name, at most three sessions  
516 per event (maps to experiment\_round in participants.csv)
- 517 • event\_name: name of the data collection event (maps to the same attribute in  
518 participants.csv)
- 519 • experiment\_no: the serial number of the napping paper in the session\_round\_name in  
520 which it was collected (maps to experiment\_no in participants.csv)
- 521 • experiment\_id: id of the wine annotated
- 522 • coor1: x-axis coordinate on the napping paper
- 523 • coor2: y-axis coordinate on the napping paper
- 524 • color: color of the sticker used

525 participants.csv contains the following fields:

- 526 • session\_round\_name: session number during the event\_name, at most three sessions  
527 per event (maps to experiment\_round in napping.csv)
- 528 • event\_name: name of data-collection event (maps to event\_name in napping.csv)
- 529 • experiment\_no: the serial number of the napping paper in the session\_round\_name in  
530 which it was collected (maps to experiment\_no in napping.csv)
- 531 • round\_id: round number (from 1-3)
- 532 • participant\_id: id the participant was given in the experiment

533 images\_reviews\_attributes.csv contains the following fields:

- 534 • vintage\_id: vintage id of the wine
- 535 • image: image link (each <image name>.jpg in chunk\_<chunk num>.zip can be  
536 mapped to a corresponding image link in this column by removing the /p prefix from  
537 the link).
- 538 • review: user review of the wine

- 539 • `experiment_id`: id the wine got during data collection (each `experiment_id` can be
- 540 mapped to the same column in `napping.csv`)
- 541 • `year`: year the wine was produced
- 542 • `winery_id`: id of the winery that produced the wine
- 543 • `wine`: name of the wine
- 544 • `alcohol`: the wine’s alcohol percentage
- 545 • `country`: the country where the wine was produced
- 546 • `region`: the region where the wine was produced
- 547 • `price`: price of the wine in USD (collected 05/2023)
- 548 • `rating`: average rating of the wine (collected 05/2023)
- 549 • `grape`: the wine’s grape composition, represented as a comma-separated list ordered in
- 550 descending sequence of the percentage contribution of each grape variety to the overall
- 551 blend.

## 552 C Implementation details for flavor space generation

553 **Preprocessing.** For the image data, we resized images to a 256x256 pixel format, applied a central  
 554 crop to bring the images down to 224x224 pixels. Subsequently, we converted them into a tensor  
 555 format, followed by normalization using mean and standard deviation values for each color channel  
 556 (RGB).

557 For the user reviews, we first converted the text to lowercase to maintain consistency. Then, we  
 558 removed punctuation marks to minimize noise. We further eliminated stopwords using the nltk  
 559 library’s English stopword list since these words usually do not contribute significantly to the overall  
 560 meaning of the reviews. After these preprocessing steps, the data was tokenized and reassembled into  
 561 a clean text string.

562 The preprocessing of human-annotated data varied based on its intended use, either as a distance  
 563 matrix or triplets. In the former case, we calculated the Euclidean distances between each data point  
 564 and arranged these distances into an  $N \times N$  matrix, where  $N$  is the total number of annotated wines.  
 565 The matrix element  $m[i][j]$  had a value of 0 if there were no annotated distances between wines  $i$   
 566 and  $j$ . For the latter scenario, we constructed a list of triplets derived from the computed Euclidean  
 567 distances. We generated triplets  $(i, j, k)$  based on the Euclidean distances, such that  $i$  is closer to  $j$   
 568 than to  $k$ ; i.e.  $\|i - j\|_2 < \|i - k\|_2$ .

569 **Dimensionality reduction.** In our experiments, we used several dimensionality reduction methods  
 570 such as NMDS, t-STE, t-SNE, PCA, and UMAP. For these methods, we prepared two embedding  
 571 pipelines, one to reduce the dimensionality of machine kernel, and another to reduce the dimensional-  
 572 ity of the human kernel.

573 For the human kernel, NMDS and t-STE were used. The NMDS method was optimized through  
 574 a series of hyperparameter tunings, including number of initial positions (`n_inits`), maximum  
 575 number of iterations (`max_iters`), and tolerance to stress convergence (`eps_values`). These  
 576 hyperparameters were evaluated using a range of values with the number of initial positions set to  
 577 5, 7, 10, the maximum number of iterations set to 300, 400, 500, 600, and the tolerance for stress  
 578 convergence set to 1e-3, 1e-4, 1e-5.

579 The optimal hyperparameters for NMDS were selected by applying 5-fold cross validation  
 580 (`cross_val_score`) using a K-nearest neighbors classifier model (`KNeighborsClassifier`) and  
 581 oversampling to handle class imbalances in the data. In NMDS, The parameter `metric` was set  
 582 to `False` to handle dissimilarities missing values represented by zeroes, and `dissimilarity` to  
 583 precomputed as the input data was a distance matrix. Classification improvements during grid-search  
 584 were not significant.

For the machine kernel pipeline, t-SNE, PCA, and UMAP, were used with a set seed to ensure the results’ reproducibility. These methods were called using their default hyperparameters in the respective libraries (see External packages).

**Pre-trained models.** The machine kernel embeddings were obtained using a collection of pre-trained text, image, and combined image-text models. All models were obtained from the HuggingFace [hug] library. The chosen models for the text were T5 (60.5M params), ALBERT (11.8M params), BART (139M params), DistilBERT (67M params), and CLIP text model. For images, we chose ViT, DeiT, ResNET-50 and the CLIP image encoder. Lastly, we used CLIP for the combined image-text model. All embeddings were obtained from the models’ last hidden state.

**Combiners.** We leveraged three methods to combine the human kernel and the machine kernel: CCA, ICP, and SNaCK. These three methods were employed using their default hyperparameters in their respective libraries (see External packages). In the case of CCA and ICP, we found common experiment identifiers across the two datasets and used them to align corresponding data points from the two datasets. Once the matrices were aligned, we subsequently applied CCA and ICP, respectively, and generated the combined embeddings thus.

SNaCK follows a slightly different process as it uses triplets from the human kernel and an embedding matrix from the machine kernel. We passed the triplet list (human kernel) and scaled embeddings (machine kernel) into SNaCK, which output the combined embedding.

**External packages.** We used several external packages: `scikit-learn` (v1.2.2) [sci], for dimensionality reduction, hyperparameter optimization, classification and human-and machine kernel combination; `umap-learn` (v0.5.3) [uma], for dimensionality reduction of the machine kernel; `imblearn` (v0.10.1) [imb], to address the problem of imbalanced datasets; `snack` `sna`, an implementation of SNaCK for human-and machine kernel combination; `icp` [icp], implementing the Iterative Closest Point algorithm for human-and machine kernel combination; and `tste` [tst], an implementation of the t-Distributed Stochastic Triplet Embedding algorithm for the dimensionality reduction of human-kernel triplets. Additionally, our project employed these Python packages: `torchmetrics` (v0.11.4) [tor], `ftfy` (v6.1.1) [ftf], `open-clip-torch` (v2.19.0) [ope], `transformers` (v4.28.1) [tra], `pandas` (v2.0.1) [pan], `nltk` (v3.8.1) [nlt], `psutil` (v5.9.5) [psu], `urllib3` (v1.26.15) [url], `matplotlib` (v3.5.1) [mat], `seaborn` (v0.11.2) [sea], and `h5py` (v3.8.0) [h5p].

## D Details for fine-grained flavor predictions

**Implementation details.** The combination of dimensionality reduction methods, pre-trained models, and combiners described in D were used to generate multiple flavor spaces (using images, text and flavor). Additionally, to compare TAR across modalities, embeddings were produced for all combinations of modalities (text, image and flavor) using the relevant methods from D.

The human kernel was split into a training and a testing set. We made sure that for any given triplet  $(i, j, k)$  in the testing set, none of the wines  $i$ ,  $j$  or  $k$  were present in the training set. The training set was processed and combined with the machine kernel using the reduction methods and combiners from D. The triplet agreement ratio was calculated using the level of agreement between the testing set and the triplets in the embeddings, by dividing agreements with disagreements. The triplet agreement ratio’s random baseline was set at 0.5, because when comparing triplets, either  $(i, j, k)$  or  $(j, i, k)$  could be chosen, which makes the ratio 0.5/1.0, similar to a random guess.

**Results.** All results produced in this experiment can be found in tables 5, 6 and 7.

## E Details for coarse-grained flavor predictions.

## F Implementation Details

We utilize a SVM classifier with parameter `class_weight` set to balanced and and K-fold cross-validation with `n_splits` set to 5 and `shuffle` set to True using the classifier SVC and the method

Table 5: **Fine-grained flavor predictions: Text encoders.** Triplet Agreement Ratio (TAR) between text encoders and human annotated flavor similarities.

| Machine Kernel     | Human Kernel | Combiner | Modality      | TAR $\uparrow$ |
|--------------------|--------------|----------|---------------|----------------|
| DistilBeRT + UMAP  |              |          | Text only     | 0.81           |
| DistilBeRT + t-SNE |              |          | Text only     | 0.81           |
| DistilBeRT + UMAP  | MDS          | CCA      | Text + flavor | <b>0.91</b>    |
| DistilBeRT + t-SNE | MDS          | ICP      | Text + flavor | 0.90           |
| DistilBeRT + t-SNE | MDS          | CCA      | Text + flavor | 0.90           |
| DistilBeRT + UMAP  | t-STE        | CCA      | Text + flavor | 0.76           |
| DistilBeRT + t-SNE | t-STE        | ICP      | Text + flavor | 0.78           |
| DistilBeRT + t-SNE | t-STE        | SNaCK    | Text + flavor | 0.75           |
| T5 + UMAP          |              |          | Text only     | 0.82           |
| T5 + t-SNE         |              |          | Text only     | 0.82           |
| T5 + UMAP          | MDS          | CCA      | Text + flavor | 0.89           |
| T5 + t-SNE         | MDS          | ICP      | Text + flavor | <b>0.90</b>    |
| T5 + t-SNE         | MDS          | CCA      | Text + flavor | <b>0.90</b>    |
| T5 + UMAP          | t-STE        | CCA      | Text + flavor | 0.83           |
| T5 + t-SNE         | t-STE        | ICP      | Text + flavor | 0.78           |
| T5 + t-SNE         | t-STE        | SNaCK    | Text + flavor | 0.84           |
| ALBERT + UMAP      |              |          | Text only     | 0.80           |
| ALBERT + t-SNE     |              |          | Text only     | 0.81           |
| ALBERT + UMAP      | MDS          | CCA      | Text + flavor | 0.89           |
| ALBERT + t-SNE     | MDS          | ICP      | Text + flavor | <b>0.90</b>    |
| ALBERT + t-SNE     | MDS          | CCA      | Text + flavor | <b>0.90</b>    |
| ALBERT + UMAP      | t-STE        | CCA      | Text + flavor | 0.74           |
| ALBERT + t-SNE     | t-STE        | ICP      | Text + flavor | 0.78           |
| ALBERT + t-SNE     | t-STE        | SNaCK    | Text + flavor | 0.78           |
| BART + UMAP        |              |          | Text only     | 0.81           |
| BART + t-SNE       |              |          | Text only     | 0.82           |
| BART + UMAP        | MDS          | CCA      | Text + flavor | 0.89           |
| BART + t-SNE       | MDS          | ICP      | Text + flavor | <b>0.90</b>    |
| BART + t-SNE       | MDS          | CCA      | Text + flavor | 0.89           |
| BART + UMAP        | t-STE        | CCA      | Text + flavor | 0.78           |
| BART + t-SNE       | t-STE        | ICP      | Text + flavor | 0.79           |
| BART + t-SNE       | t-STE        | SNaCK    | Text + flavor | 0.72           |

631 KFold from the Scikit-Learn library [sci]. Additionally we utilize RandomOverSampler from the  
632 imblearn library with `sampling_strategy` set to 'not majority'. When dealing with non-numerical  
633 attributes, a LabelEncoder (using the default values) from Scikit-Learn [sci] was used to create  
634 numerical features. The random baseline value was calculated by dividing 1 by the number of classes  
635 to predict.

636 **Results.** All results produced in this experiment can be found in tables 8, 9, 10, 11, 12, 13, 14, 15  
637 and 16.

Table 6: **Fine-grained flavor predictions: Image encoders.** Triplet Agreement Ratio (TAR) between image encoders and human annotated flavor similarities.

| Machine Kernel | Human Kernel | Combiner | Modality       | TAR $\uparrow$ |
|----------------|--------------|----------|----------------|----------------|
| ViT + UMAP     |              |          | Image only     | 0.83           |
| ViT + t-SNE    |              |          | Image only     | 0.82           |
| ViT + UMAP     | MDS          | CCA      | Image + flavor | <b>0.90</b>    |
| ViT + t-SNE    | MDS          | ICP      | Image + flavor | <b>0.90</b>    |
| ViT + t-SNE    | MDS          | CCA      | Image + flavor | <b>0.90</b>    |
| ViT + UMAP     | t-STE        | CCA      | Image + flavor | 0.82           |
| ViT + t-SNE    | t-STE        | ICP      | Image + flavor | 0.78           |
| ViT + t-SNE    | t-STE        | SNaCK    | Image + flavor | 0.75           |
| ResNET + UMAP  |              |          | Image only     | 0.82           |
| ResNET + t-SNE |              |          | Image only     | 0.82           |
| ResNET + UMAP  | MDS          | CCA      | Image + flavor | 0.89           |
| ResNET + t-SNE | MDS          | ICP      | Image + flavor | <b>0.90</b>    |
| ResNET + t-SNE | MDS          | CCA      | Image + flavor | 0.88           |
| ResNET + UMAP  | t-STE        | CCA      | Image + flavor | 0.79           |
| ResNET + t-SNE | t-STE        | ICP      | Image + flavor | 0.78           |
| ResNET + t-SNE | t-STE        | SNaCK    | Image + flavor | 0.76           |
| DeiT + UMAP    |              |          | Image only     | 0.82           |
| DeiT + t-SNE   |              |          | Image only     | 0.83           |
| DeiT + UMAP    | MDS          | CCA      | Image + flavor | 0.91           |
| DeiT + t-SNE   | MDS          | ICP      | Image + flavor | 0.90           |
| DeiT + t-SNE   | MDS          | CCA      | Image + flavor | <b>0.92</b>    |
| DeiT + UMAP    | t-STE        | CCA      | Image + flavor | 0.82           |
| DeiT + t-SNE   | t-STE        | ICP      | Image + flavor | 0.78           |
| DeiT + t-SNE   | t-STE        | SNaCK    | Image + flavor | 0.86           |
| CLIP + UMAP    |              |          | Image only     | 0.82           |
| CLIP + t-SNE   |              |          | Image only     | 0.82           |
| CLIP + UMAP    | MDS          | CCA      | Image + flavor | 0.89           |
| CLIP + t-SNE   | MDS          | ICP      | Image + flavor | <b>0.90</b>    |
| CLIP + t-SNE   | MDS          | CCA      | Image + flavor | <b>0.90</b>    |
| CLIP + UMAP    | t-STE        | CCA      | Image + flavor | 0.81           |
| CLIP + t-SNE   | t-STE        | ICP      | Image + flavor | 0.78           |
| CLIP + t-SNE   | t-STE        | SNaCK    | Image + flavor | 0.81           |

Table 7: **Fine-grained flavor predictions: Text-Image encoder.** Triplet Agreement Ratio (TAR) between CLIP and human annotated flavor similarities.

| Machine Kernel | Human Kernel | Combiner | TAR Machine Kernel $\uparrow$ | TAR $\uparrow$ |
|----------------|--------------|----------|-------------------------------|----------------|
| CLIP + UMAP    |              |          | Image + text                  | 0.82           |
| CLIP + t-SNE   |              |          | Image + text                  | 0.81           |
| CLIP + UMAP    | MDS          | CCA      | Image + text + flavor         | <b>0.91</b>    |
| CLIP + t-SNE   | MDS          | ICP      | Image + text + flavor         | 0.90           |
| CLIP + t-SNE   | MDS          | CCA      | Image + text + flavor         | <b>0.91</b>    |
| CLIP + UMAP    | t-STE        | CCA      | Image + text + flavor         | 0.84           |
| CLIP + t-SNE   | t-STE        | ICP      | Image + text + flavor         | 0.78           |
| CLIP + t-SNE   | t-STE        | SNaCK    | Image + text + flavor         | 0.79           |

Table 8: **DistilBeRT**: Classification results.

| Machine Kernel     | Human Kernel | Combiner | Class   | Modality      | Pred | ACC $\uparrow$ |
|--------------------|--------------|----------|---------|---------------|------|----------------|
| Random             |              |          | Country |               |      | 0.13           |
| DistilBeRT + UMAP  |              |          | Country | Text only     | SVM  | 0.07           |
| DistilBeRT + t-SNE |              |          | Country | Text only     | SVM  | 0.19           |
| DistilBeRT + UMAP  | MDS          | CCA      | Country | Text + flavor | SVM  | <b>0.27</b>    |
| DistilBeRT + t-SNE | MDS          | ICP      | Country | Text + flavor | SVM  | 0.20           |
| DistilBeRT + t-SNE | MDS          | CCA      | Country | Text + flavor | SVM  | 0.22           |
| DistilBeRT + UMAP  | t-STE        | CCA      | Country | Text + flavor | SVM  | 0.24           |
| DistilBeRT + t-SNE | t-STE        | ICP      | Country | Text + flavor | SVM  | 0.20           |
| DistilBeRT + t-SNE | t-STE        | SNaCK    | Country | Text + flavor | SVM  | 0.15           |
| Random             |              |          | Region  |               |      | 0.02           |
| DistilBeRT + UMAP  |              |          | Region  | Text only     | SVM  | 0.01           |
| DistilBeRT + t-SNE |              |          | Region  | Text only     | SVM  | 0.02           |
| DistilBeRT + UMAP  | MDS          | CCA      | Region  | Text + flavor | SVM  | 0.02           |
| DistilBeRT + t-SNE | MDS          | ICP      | Region  | Text + flavor | SVM  | 0.01           |
| DistilBeRT + t-SNE | MDS          | CCA      | Region  | Text + flavor | SVM  | <b>0.04</b>    |
| DistilBeRT + UMAP  | t-STE        | CCA      | Region  | Text + flavor | SVM  | 0.02           |
| DistilBeRT + t-SNE | t-STE        | ICP      | Region  | Text + flavor | SVM  | 0.01           |
| DistilBeRT + t-SNE | t-STE        | SNaCK    | Region  | Text + flavor | SVM  | 0.00           |
| Random             |              |          | Grape   |               |      | 0.03           |
| DistilBeRT + UMAP  |              |          | Grape   | Text only     | SVM  | 0.01           |
| DistilBeRT + t-SNE |              |          | Grape   | Text only     | SVM  | 0.05           |
| DistilBeRT + UMAP  | MDS          | CCA      | Grape   | Text + flavor | SVM  | <b>0.08</b>    |
| DistilBeRT + t-SNE | MDS          | ICP      | Grape   | Text + flavor | SVM  | 0.05           |
| DistilBeRT + t-SNE | MDS          | CCA      | Grape   | Text + flavor | SVM  | 0.03           |
| DistilBeRT + UMAP  | t-STE        | CCA      | Grape   | Text + flavor | SVM  | 0.07           |
| DistilBeRT + t-SNE | t-STE        | ICP      | Grape   | Text + flavor | SVM  | 0.04           |
| DistilBeRT + t-SNE | t-STE        | SNaCK    | Grape   | Text + flavor | SVM  | 0.04           |
| Random             |              |          | Alc %   |               |      | 0.17           |
| DistilBeRT + UMAP  |              |          | Alc %   | Text only     | SVM  | 0.12           |
| DistilBeRT + t-SNE |              |          | Alc %   | Text only     | SVM  | 0.27           |
| DistilBeRT + UMAP  | MDS          | CCA      | Alc %   | Text + flavor | SVM  | 0.45           |
| DistilBeRT + t-SNE | MDS          | ICP      | Alc %   | Text + flavor | SVM  | 0.34           |
| DistilBeRT + t-SNE | MDS          | CCA      | Alc %   | Text + flavor | SVM  | <b>0.49</b>    |
| DistilBeRT + UMAP  | t-STE        | CCA      | Alc %   | Text + flavor | SVM  | 0.48           |
| DistilBeRT + t-SNE | t-STE        | ICP      | Alc %   | Text + flavor | SVM  | 0.34           |
| DistilBeRT + t-SNE | t-STE        | SNaCK    | Alc %   | Text + flavor | SVM  | 0.10           |
| Random             |              |          | Price   |               |      | 0.10           |
| DistilBeRT + UMAP  |              |          | Price   | Text only     | SVM  | 0.11           |
| DistilBeRT + t-SNE |              |          | Price   | Text only     | SVM  | 0.20           |
| DistilBeRT + UMAP  | MDS          | CCA      | Price   | Text + flavor | SVM  | 0.21           |
| DistilBeRT + t-SNE | MDS          | ICP      | Price   | Text + flavor | SVM  | 0.14           |
| DistilBeRT + t-SNE | MDS          | CCA      | Price   | Text + flavor | SVM  | 0.18           |
| DistilBeRT + UMAP  | t-STE        | CCA      | Price   | Text + flavor | SVM  | <b>0.30</b>    |
| DistilBeRT + t-SNE | t-STE        | ICP      | Price   | Text + flavor | SVM  | 0.14           |
| DistilBeRT + t-SNE | t-STE        | SNaCK    | Price   | Text + flavor | SVM  | 0.11           |
| Random             |              |          | Rating  |               |      | 0.25           |
| DistilBeRT + UMAP  |              |          | Rating  | Text only     | SVM  | 0.25           |
| DistilBeRT + t-SNE |              |          | Rating  | Text only     | SVM  | 0.27           |
| DistilBeRT + UMAP  | MDS          | CCA      | Rating  | Text + flavor | SVM  | 0.45           |
| DistilBeRT + t-SNE | MDS          | ICP      | Rating  | Text + flavor | SVM  | 0.33           |
| DistilBeRT + t-SNE | MDS          | CCA      | Rating  | Text + flavor | SVM  | 0.48           |
| DistilBeRT + UMAP  | t-STE        | CCA      | Rating  | Text + flavor | SVM  | <b>0.59</b>    |
| DistilBeRT + t-SNE | t-STE        | ICP      | Rating  | Text + flavor | SVM  | 0.33           |
| DistilBeRT + t-SNE | t-STE        | SNaCK    | Rating  | Text + flavor | SVM  | 0.19           |
| Random             |              |          | Year    |               |      | 0.08           |
| DistilBeRT + UMAP  |              |          | Year    | Text only     | SVM  | 0.04           |
| DistilBeRT + t-SNE |              |          | Year    | Text only     | SVM  | 0.08           |
| DistilBeRT + UMAP  | MDS          | CCA      | Year    | Text + flavor | SVM  | <b>0.17</b>    |
| DistilBeRT + t-SNE | MDS          | ICP      | Year    | Text + flavor | SVM  | 0.10           |
| DistilBeRT + t-SNE | MDS          | CCA      | Year    | Text + flavor | SVM  | 0.13           |
| DistilBeRT + UMAP  | t-STE        | CCA      | Year    | Text + flavor | SVM  | 0.16           |
| DistilBeRT + t-SNE | t-STE        | ICP      | Year    | Text + flavor | SVM  | 0.10           |
| DistilBeRT + t-SNE | t-STE        | SNaCK    | Year    | Text + flavor | SVM  | 0.09           |

Table 9: **T5**: Classification results.

| Machine Kernel | Human Kernel | Combiner | Class   | Modality      | Pred | ACC $\uparrow$ |
|----------------|--------------|----------|---------|---------------|------|----------------|
| Random         |              |          | Country |               |      | 0.13           |
| T5 + UMAP      |              |          | Country | Text only     | SVM  | 0.05           |
| T5 + t-SNE     |              |          | Country | Text only     | SVM  | 0.11           |
| T5 + UMAP      | MDS          | CCA      | Country | Text + flavor | SVM  | 0.11           |
| T5 + t-SNE     | MDS          | ICP      | Country | Text + flavor | SVM  | 0.08           |
| T5 + t-SNE     | MDS          | CCA      | Country | Text + flavor | SVM  | 0.13           |
| T5 + UMAP      | t-STE        | CCA      | Country | Text + flavor | SVM  | <b>0.18</b>    |
| T5 + t-SNE     | t-STE        | ICP      | Country | Text + flavor | SVM  | 0.08           |
| T5 + t-SNE     | t-STE        | SNaCK    | Country | Text + flavor | SVM  | 0.08           |
| Random         |              |          | Region  |               |      | 0.02           |
| T5 + UMAP      |              |          | Region  | Text only     | SVM  | 0.01           |
| T5 + t-SNE     |              |          | Region  | Text only     | SVM  | 0.01           |
| T5 + UMAP      | MDS          | CCA      | Region  | Text + flavor | SVM  | 0.01           |
| T5 + t-SNE     | MDS          | ICP      | Region  | Text + flavor | SVM  | 0.00           |
| T5 + t-SNE     | MDS          | CCA      | Region  | Text + flavor | SVM  | 0.02           |
| T5 + UMAP      | t-STE        | CCA      | Region  | Text + flavor | SVM  | <b>0.04</b>    |
| T5 + t-SNE     | t-STE        | ICP      | Region  | Text + flavor | SVM  | 0.00           |
| T5 + t-SNE     | t-STE        | SNaCK    | Region  | Text + flavor | SVM  | 0.01           |
| Random         |              |          | Grape   |               |      | 0.03           |
| T5 + UMAP      |              |          | Grape   | Text only     | SVM  | 0.02           |
| T5 + t-SNE     |              |          | Grape   | Text only     | SVM  | 0.03           |
| T5 + UMAP      | MDS          | CCA      | Grape   | Text + flavor | SVM  | 0.03           |
| T5 + t-SNE     | MDS          | ICP      | Grape   | Text + flavor | SVM  | 0.03           |
| T5 + t-SNE     | MDS          | CCA      | Grape   | Text + flavor | SVM  | <b>0.05</b>    |
| T5 + UMAP      | t-STE        | CCA      | Grape   | Text + flavor | SVM  | <b>0.05</b>    |
| T5 + t-SNE     | t-STE        | ICP      | Grape   | Text + flavor | SVM  | 0.03           |
| T5 + t-SNE     | t-STE        | SNaCK    | Grape   | Text + flavor | SVM  | 0.03           |
| Random         |              |          | Alc %   |               |      | 0.17           |
| T5 + UMAP      |              |          | Alc %   | Text only     | SVM  | 0.34           |
| T5 + t-SNE     |              |          | Alc %   | Text only     | SVM  | 0.21           |
| T5 + UMAP      | MDS          | CCA      | Alc %   | Text + flavor | SVM  | 0.50           |
| T5 + t-SNE     | MDS          | ICP      | Alc %   | Text + flavor | SVM  | 0.32           |
| T5 + t-SNE     | MDS          | CCA      | Alc %   | Text + flavor | SVM  | <b>0.55</b>    |
| T5 + UMAP      | t-STE        | CCA      | Alc %   | Text + flavor | SVM  | 0.50           |
| T5 + t-SNE     | t-STE        | ICP      | Alc %   | Text + flavor | SVM  | 0.32           |
| T5 + t-SNE     | t-STE        | SNaCK    | Alc %   | Text + flavor | SVM  | 0.36           |
| Random         |              |          | Price   |               |      | 0.10           |
| T5 + UMAP      |              |          | Price   | Text only     | SVM  | 0.10           |
| T5 + t-SNE     |              |          | Price   | Text only     | SVM  | 0.18           |
| T5 + UMAP      | MDS          | CCA      | Price   | Text + flavor | SVM  | 0.22           |
| T5 + t-SNE     | MDS          | ICP      | Price   | Text + flavor | SVM  | 0.23           |
| T5 + t-SNE     | MDS          | CCA      | Price   | Text + flavor | SVM  | <b>0.24</b>    |
| T5 + UMAP      | t-STE        | CCA      | Price   | Text + flavor | SVM  | 0.17           |
| T5 + t-SNE     | t-STE        | ICP      | Price   | Text + flavor | SVM  | 0.22           |
| T5 + t-SNE     | t-STE        | SNaCK    | Price   | Text + flavor | SVM  | 0.16           |
| Random         |              |          | Rating  |               |      | 0.25           |
| T5 + UMAP      |              |          | Rating  | Text only     | SVM  | 0.24           |
| T5 + t-SNE     |              |          | Rating  | Text only     | SVM  | 0.43           |
| T5 + UMAP      | MDS          | CCA      | Rating  | Text + flavor | SVM  | 0.48           |
| T5 + t-SNE     | MDS          | ICP      | Rating  | Text + flavor | SVM  | 0.43           |
| T5 + t-SNE     | MDS          | CCA      | Rating  | Text + flavor | SVM  | 0.39           |
| T5 + UMAP      | t-STE        | CCA      | Rating  | Text + flavor | SVM  | <b>0.53</b>    |
| T5 + t-SNE     | t-STE        | ICP      | Rating  | Text + flavor | SVM  | 0.43           |
| T5 + t-SNE     | t-STE        | SNaCK    | Rating  | Text + flavor | SVM  | 0.37           |
| Random         |              |          | Year    |               |      | 0.08           |
| T5 + UMAP      |              |          | Year    | Text only     | SVM  | 0.06           |
| T5 + t-SNE     |              |          | Year    | Text only     | SVM  | 0.10           |
| T5 + UMAP      | MDS          | CCA      | Year    | Text + flavor | SVM  | 0.12           |
| T5 + t-SNE     | MDS          | ICP      | Year    | Text + flavor | SVM  | 0.10           |
| T5 + t-SNE     | MDS          | CCA      | Year    | Text + flavor | SVM  | <b>0.12</b>    |
| T5 + UMAP      | t-STE        | CCA      | Year    | Text + flavor | SVM  | 0.11           |
| T5 + t-SNE     | t-STE        | ICP      | Year    | Text + flavor | SVM  | 0.10           |
| T5 + t-SNE     | t-STE        | SNaCK    | Year    | Text + flavor | SVM  | 0.09           |

Table 10: **ALBERT**: Classification results.

| Machine Kernel | Human Kernel | Combiner | Class   | Modality      | Pred | ACC $\uparrow$ |
|----------------|--------------|----------|---------|---------------|------|----------------|
| Random         |              |          | Country |               |      | 0.13           |
| ALBERT + UMAP  |              |          | Country | Text only     | SVM  | 0.09           |
| ALBERT + t-SNE |              |          | Country | Text only     | SVM  | 0.16           |
| ALBERT + UMAP  | MDS          | CCA      | Country | Text + flavor | SVM  | <b>0.20</b>    |
| ALBERT + t-SNE | MDS          | ICP      | Country | Text + flavor | SVM  | 0.10           |
| ALBERT + t-SNE | MDS          | CCA      | Country | Text + flavor | SVM  | 0.19           |
| ALBERT + UMAP  | t-STE        | CCA      | Country | Text + flavor | SVM  | 0.14           |
| ALBERT + t-SNE | t-STE        | ICP      | Country | Text + flavor | SVM  | 0.10           |
| ALBERT + t-SNE | t-STE        | SNACK    | Country | Text + flavor | SVM  | 0.12           |
| Random         |              |          | Region  |               |      | 0.02           |
| ALBERT + UMAP  |              |          | Region  | Text only     | SVM  | <b>0.03</b>    |
| ALBERT + t-SNE |              |          | Region  | Text only     | SVM  | 0.00           |
| ALBERT + UMAP  | MDS          | CCA      | Region  | Text + flavor | SVM  | <b>0.03</b>    |
| ALBERT + t-SNE | MDS          | ICP      | Region  | Text + flavor | SVM  | <b>0.03</b>    |
| ALBERT + t-SNE | MDS          | CCA      | Region  | Text + flavor | SVM  | 0.02           |
| ALBERT + UMAP  | t-STE        | CCA      | Region  | Text + flavor | SVM  | <b>0.03</b>    |
| ALBERT + t-SNE | t-STE        | ICP      | Region  | Text + flavor | SVM  | <b>0.03</b>    |
| ALBERT + t-SNE | t-STE        | SNACK    | Region  | Text + flavor | SVM  | <b>0.03</b>    |
| Random         |              |          | Grape   |               |      | 0.03           |
| ALBERT + UMAP  |              |          | Grape   | Text only     | SVM  | 0.0            |
| ALBERT + t-SNE |              |          | Grape   | Text only     | SVM  | 0.0            |
| ALBERT + UMAP  | MDS          | CCA      | Grape   | Text + flavor | SVM  | 0.02           |
| ALBERT + t-SNE | MDS          | ICP      | Grape   | Text + flavor | SVM  | <b>0.04</b>    |
| ALBERT + t-SNE | MDS          | CCA      | Grape   | Text + flavor | SVM  | 0.02           |
| ALBERT + UMAP  | t-STE        | CCA      | Grape   | Text + flavor | SVM  | 0.02           |
| ALBERT + t-SNE | t-STE        | ICP      | Grape   | Text + flavor | SVM  | 0.03           |
| ALBERT + t-SNE | t-STE        | SNACK    | Grape   | Text + flavor | SVM  | 0.02           |
| Random         |              |          | Alc %   |               |      | 0.17           |
| ALBERT + UMAP  |              |          | Alc %   | Text only     | SVM  | 0.11           |
| ALBERT + t-SNE |              |          | Alc %   | Text only     | SVM  | 0.24           |
| ALBERT + UMAP  | MDS          | CCA      | Alc %   | Text + flavor | SVM  | <b>0.46</b>    |
| ALBERT + t-SNE | MDS          | ICP      | Alc %   | Text + flavor | SVM  | 0.34           |
| ALBERT + t-SNE | MDS          | CCA      | Alc %   | Text + flavor | SVM  | <b>0.46</b>    |
| ALBERT + UMAP  | t-STE        | CCA      | Alc %   | Text + flavor | SVM  | 0.41           |
| ALBERT + t-SNE | t-STE        | ICP      | Alc %   | Text + flavor | SVM  | 0.33           |
| ALBERT + t-SNE | t-STE        | SNACK    | Alc %   | Text + flavor | SVM  | 0.41           |
| Random         |              |          | Price   |               |      | 0.10           |
| ALBERT + UMAP  |              |          | Price   | Text only     | SVM  | 0.09           |
| ALBERT + t-SNE |              |          | Price   | Text only     | SVM  | 0.17           |
| ALBERT + UMAP  | MDS          | CCA      | Price   | Text + flavor | SVM  | <b>0.27</b>    |
| ALBERT + t-SNE | MDS          | ICP      | Price   | Text + flavor | SVM  | 0.26           |
| ALBERT + t-SNE | MDS          | CCA      | Price   | Text + flavor | SVM  | 0.26           |
| ALBERT + UMAP  | t-STE        | CCA      | Price   | Text + flavor | SVM  | 0.24           |
| ALBERT + t-SNE | t-STE        | ICP      | Price   | Text + flavor | SVM  | 0.26           |
| ALBERT + t-SNE | t-STE        | SNACK    | Price   | Text + flavor | SVM  | 0.24           |
| Random         |              |          | Rating  |               |      | 0.25           |
| ALBERT + UMAP  |              |          | Rating  | Text only     | SVM  | 0.16           |
| ALBERT + t-SNE |              |          | Rating  | Text only     | SVM  | 0.35           |
| ALBERT + UMAP  | MDS          | CCA      | Rating  | Text + flavor | SVM  | 0.44           |
| ALBERT + t-SNE | MDS          | ICP      | Rating  | Text + flavor | SVM  | 0.33           |
| ALBERT + t-SNE | MDS          | CCA      | Rating  | Text + flavor | SVM  | <b>0.55</b>    |
| ALBERT + UMAP  | t-STE        | CCA      | Rating  | Text + flavor | SVM  | 0.39           |
| ALBERT + t-SNE | t-STE        | ICP      | Rating  | Text + flavor | SVM  | 0.33           |
| ALBERT + t-SNE | t-STE        | SNACK    | Rating  | Text + flavor | SVM  | 0.39           |
| Random         |              |          | Year    |               |      | 0.08           |
| ALBERT + UMAP  |              |          | Year    | Text only     | SVM  | 0.09           |
| ALBERT + t-SNE |              |          | Year    | Text only     | SVM  | 0.09           |
| ALBERT + UMAP  | MDS          | CCA      | Year    | Text + flavor | SVM  | <b>0.17</b>    |
| ALBERT + t-SNE | MDS          | ICP      | Year    | Text + flavor | SVM  | 0.08           |
| ALBERT + t-SNE | MDS          | CCA      | Year    | Text + flavor | SVM  | 0.13           |
| ALBERT + UMAP  | t-STE        | CCA      | Year    | Text + flavor | SVM  | 0.12           |
| ALBERT + t-SNE | t-STE        | ICP      | Year    | Text + flavor | SVM  | 0.08           |
| ALBERT + t-SNE | t-STE        | SNACK    | Year    | Text + flavor | SVM  | 0.12           |

Table 11: **BART**: Classification results.

| Machine Kernel | Human Kernel | Combiner | Class   | Modality      | Pred | ACC $\uparrow$ |
|----------------|--------------|----------|---------|---------------|------|----------------|
| Random         |              |          | Country |               |      | 0.13           |
| BART + UMAP    |              |          | Country | Text only     | SVM  | 0.06           |
| BART + t-SNE   |              |          | Country | Text only     | SVM  | 0.12           |
| BART + UMAP    | MDS          | CCA      | Country | Text + flavor | SVM  | 0.16           |
| BART + t-SNE   | MDS          | ICP      | Country | Text + flavor | SVM  | 0.17           |
| BART + t-SNE   | MDS          | CCA      | Country | Text + flavor | SVM  | 0.15           |
| BART + UMAP    | t-STE        | CCA      | Country | Text + flavor | SVM  | <b>0.21</b>    |
| BART + t-SNE   | t-STE        | ICP      | Country | Text + flavor | SVM  | 0.17           |
| BART + t-SNE   | t-STE        | SNaCK    | Country | Text + flavor | SVM  | 0.15           |
| Random         |              |          | Region  |               |      | <b>0.02</b>    |
| BART + UMAP    |              |          | Region  | Text only     | SVM  | 0.00           |
| BART + t-SNE   |              |          | Region  | Text only     | SVM  | 0.00           |
| BART + UMAP    | MDS          | CCA      | Region  | Text + flavor | SVM  | 0.00           |
| BART + t-SNE   | MDS          | ICP      | Region  | Text + flavor | SVM  | 0.00           |
| BART + t-SNE   | MDS          | CCA      | Region  | Text + flavor | SVM  | 0.00           |
| BART + UMAP    | t-STE        | CCA      | Region  | Text + flavor | SVM  | 0.01           |
| BART + t-SNE   | t-STE        | ICP      | Region  | Text + flavor | SVM  | 0.00           |
| BART + t-SNE   | t-STE        | SNaCK    | Region  | Text + flavor | SVM  | 0.00           |
| Random         |              |          | Grape   |               |      | 0.03           |
| BART + UMAP    |              |          | Grape   | Text only     | SVM  | 0.01           |
| BART + t-SNE   |              |          | Grape   | Text only     | SVM  | 0.03           |
| BART + UMAP    | MDS          | CCA      | Grape   | Text + flavor | SVM  | 0.03           |
| BART + t-SNE   | MDS          | ICP      | Grape   | Text + flavor | SVM  | 0.01           |
| BART + t-SNE   | MDS          | CCA      | Grape   | Text + flavor | SVM  | 0.03           |
| BART + UMAP    | t-STE        | CCA      | Grape   | Text + flavor | SVM  | <b>0.06</b>    |
| BART + t-SNE   | t-STE        | ICP      | Grape   | Text + flavor | SVM  | 0.01           |
| BART + t-SNE   | t-STE        | SNaCK    | Grape   | Text + flavor | SVM  | 0.00           |
| Random         |              |          | Alc %   |               |      | 0.17           |
| BART + UMAP    |              |          | Alc %   | Text only     | SVM  | 0.30           |
| BART + t-SNE   |              |          | Alc %   | Text only     | SVM  | 0.32           |
| BART + UMAP    | MDS          | CCA      | Alc %   | Text + flavor | SVM  | 0.44           |
| BART + t-SNE   | MDS          | ICP      | Alc %   | Text + flavor | SVM  | 0.19           |
| BART + t-SNE   | MDS          | CCA      | Alc %   | Text + flavor | SVM  | <b>0.47</b>    |
| BART + UMAP    | t-STE        | CCA      | Alc %   | Text + flavor | SVM  | <b>0.47</b>    |
| BART + t-SNE   | t-STE        | ICP      | Alc %   | Text + flavor | SVM  | 0.19           |
| BART + t-SNE   | t-STE        | SNaCK    | Alc %   | Text + flavor | SVM  | 0.39           |
| Random         |              |          | Price   |               |      | 0.10           |
| BART + UMAP    |              |          | Price   | Text only     | SVM  | 0.14           |
| BART + t-SNE   |              |          | Price   | Text only     | SVM  | 0.21           |
| BART + UMAP    | MDS          | CCA      | Price   | Text + flavor | SVM  | <b>0.29</b>    |
| BART + t-SNE   | MDS          | ICP      | Price   | Text + flavor | SVM  | 0.12           |
| BART + t-SNE   | MDS          | CCA      | Price   | Text + flavor | SVM  | 0.23           |
| BART + UMAP    | t-STE        | CCA      | Price   | Text + flavor | SVM  | 0.20           |
| BART + t-SNE   | t-STE        | ICP      | Price   | Text + flavor | SVM  | 0.12           |
| BART + t-SNE   | t-STE        | SNaCK    | Price   | Text + flavor | SVM  | 0.13           |
| Random         |              |          | Rating  |               |      | 0.25           |
| BART + UMAP    |              |          | Rating  | Text only     | SVM  | 0.26           |
| BART + t-SNE   |              |          | Rating  | Text only     | SVM  | 0.39           |
| BART + UMAP    | MDS          | CCA      | Rating  | Text + flavor | SVM  | 0.45           |
| BART + t-SNE   | MDS          | ICP      | Rating  | Text + flavor | SVM  | 0.40           |
| BART + t-SNE   | MDS          | CCA      | Rating  | Text + flavor | SVM  | 0.49           |
| BART + UMAP    | t-STE        | CCA      | Rating  | Text + flavor | SVM  | <b>0.52</b>    |
| BART + t-SNE   | t-STE        | ICP      | Rating  | Text + flavor | SVM  | 0.40           |
| BART + t-SNE   | t-STE        | SNaCK    | Rating  | Text + flavor | SVM  | 0.29           |
| Random         |              |          | Year    |               |      | 0.08           |
| BART + UMAP    |              |          | Year    | Text only     | SVM  | 0.08           |
| BART + t-SNE   |              |          | Year    | Text only     | SVM  | <b>0.13</b>    |
| BART + UMAP    | MDS          | CCA      | Year    | Text + flavor | SVM  | 0.10           |
| BART + t-SNE   | MDS          | ICP      | Year    | Text + flavor | SVM  | 0.09           |
| BART + t-SNE   | MDS          | CCA      | Year    | Text + flavor | SVM  | 0.10           |
| BART + UMAP    | t-STE        | CCA      | Year    | Text + flavor | SVM  | <b>0.13</b>    |
| BART + t-SNE   | t-STE        | ICP      | Year    | Text + flavor | SVM  | 0.06           |
| BART + t-SNE   | t-STE        | SNaCK    | Year    | Text + flavor | SVM  | 0.10           |

Table 12: ViT: Classification results.

| Machine Kernel | Human Kernel | Combiner | Class   | Modality       | Pred | ACC $\uparrow$ |
|----------------|--------------|----------|---------|----------------|------|----------------|
| Random         |              |          | Country |                |      | 0.13           |
| ViT + UMAP     |              |          | Country | Image only     | SVM  | 0.08           |
| ViT + t-SNE    |              |          | Country | Image only     | SVM  | 0.16           |
| ViT + UMAP     | MDS          | CCA      | Country | Image + flavor | SVM  | 0.15           |
| ViT + t-SNE    | MDS          | ICP      | Country | Image + flavor | SVM  | 0.12           |
| ViT + t-SNE    | MDS          | CCA      | Country | Image + flavor | SVM  | <b>0.21</b>    |
| ViT + UMAP     | t-STE        | CCA      | Country | Image + flavor | SVM  | 0.20           |
| ViT + t-SNE    | t-STE        | ICP      | Country | Image + flavor | SVM  | 0.07           |
| ViT + t-SNE    | t-STE        | SNaCK    | Country | Image + flavor | SVM  | 0.16           |
| Random         |              |          | Region  |                |      | 0.02           |
| ViT + UMAP     |              |          | Region  | Image only     | SVM  | 0.00           |
| ViT + t-SNE    |              |          | Region  | Image only     | SVM  | 0.01           |
| ViT + UMAP     | MDS          | CCA      | Region  | Image + flavor | SVM  | <b>0.03</b>    |
| ViT + t-SNE    | MDS          | ICP      | Region  | Image + flavor | SVM  | 0.01           |
| ViT + t-SNE    | MDS          | CCA      | Region  | Image + flavor | SVM  | <b>0.03</b>    |
| ViT + UMAP     | t-STE        | CCA      | Region  | Image + flavor | SVM  | 0.01           |
| ViT + t-SNE    | t-STE        | ICP      | Region  | Image + flavor | SVM  | 0.00           |
| ViT + t-SNE    | t-STE        | SNaCK    | Region  | Image + flavor | SVM  | 0.00           |
| Random         |              |          | Grape   |                |      | 0.03           |
| ViT + UMAP     |              |          | Grape   | Image only     | SVM  | 0.00           |
| ViT + t-SNE    |              |          | Grape   | Image only     | SVM  | 0.01           |
| ViT + UMAP     | MDS          | CCA      | Grape   | Image + flavor | SVM  | <b>0.06</b>    |
| ViT + t-SNE    | MDS          | ICP      | Grape   | Image + flavor | SVM  | 0.00           |
| ViT + t-SNE    | MDS          | CCA      | Grape   | Image + flavor | SVM  | 0.03           |
| ViT + UMAP     | t-STE        | CCA      | Grape   | Image + flavor | SVM  | 0.03           |
| ViT + t-SNE    | t-STE        | ICP      | Grape   | Image + flavor | SVM  | 0.00           |
| ViT + t-SNE    | t-STE        | SNaCK    | Grape   | Image + flavor | SVM  | 0.00           |
| Random         |              |          | Alc %   |                |      | 0.17           |
| ViT + t-SNE    |              |          | Alc %   | Image only     | SVM  | 0.19           |
| ViT + UMAP     | MDS          | CCA      | Alc %   | Image only     | SVM  | 0.31           |
| ViT + t-SNE    | MDS          | ICP      | Alc %   | Image + flavor | SVM  | 0.18           |
| ViT + t-SNE    | MDS          | CCA      | Alc %   | Image + flavor | SVM  | <b>0.39</b>    |
| ViT + UMAP     | t-STE        | CCA      | Alc %   | Image + flavor | SVM  | 0.36           |
| ViT + t-SNE    | t-STE        | ICP      | Alc %   | Image + flavor | SVM  | 0.11           |
| ViT + t-SNE    | t-STE        | SNaCK    | Alc %   | Image + flavor | SVM  | 0.19           |
| Random         |              |          | Price   |                |      | 0.10           |
| ViT + UMAP     |              |          | Price   | Image only     | SVM  | 0.18           |
| ViT + t-SNE    |              |          | Price   | Image only     | SVM  | 0.21           |
| ViT + UMAP     | MDS          | CCA      | Price   | Image + flavor | SVM  | <b>0.33</b>    |
| ViT + t-SNE    | MDS          | ICP      | Price   | Image + flavor | SVM  | 0.16           |
| ViT + t-SNE    | MDS          | CCA      | Price   | Image + flavor | SVM  | 0.31           |
| ViT + UMAP     | t-STE        | CCA      | Price   | Image + flavor | SVM  | 0.24           |
| ViT + t-SNE    | t-STE        | ICP      | Price   | Image + flavor | SVM  | 0.17           |
| ViT + t-SNE    | t-STE        | SNaCK    | Price   | Image + flavor | SVM  | 0.27           |
| Random         |              |          | Rating  |                |      | 0.25           |
| ViT + UMAP     |              |          | Rating  | Image only     | SVM  | 0.23           |
| ViT + t-SNE    |              |          | Rating  | Image only     | SVM  | 0.31           |
| ViT + UMAP     | MDS          | CCA      | Rating  | Image + flavor | SVM  | 0.45           |
| ViT + t-SNE    | MDS          | ICP      | Rating  | Image + flavor | SVM  | 0.31           |
| ViT + t-SNE    | MDS          | CCA      | Rating  | Image + flavor | SVM  | 0.43           |
| ViT + UMAP     | t-STE        | CCA      | Rating  | Image + flavor | SVM  | <b>0.58</b>    |
| ViT + t-SNE    | t-STE        | ICP      | Rating  | Image + flavor | SVM  | 0.31           |
| ViT + t-SNE    | t-STE        | SNaCK    | Rating  | Image + flavor | SVM  | 0.32           |
| Random         |              |          | Year    |                |      | 0.08           |
| ViT + UMAP     |              |          | Year    | Image only     | SVM  | 0.06           |
| ViT + t-SNE    |              |          | Year    | Image only     | SVM  | 0.10           |
| ViT + UMAP     | MDS          | CCA      | Year    | Image + flavor | SVM  | 0.10           |
| ViT + t-SNE    | MDS          | ICP      | Year    | Image + flavor | SVM  | <b>0.14</b>    |
| ViT + t-SNE    | MDS          | CCA      | Year    | Image + flavor | SVM  | 0.09           |
| ViT + UMAP     | t-STE        | CCA      | Year    | Image + flavor | SVM  | 0.08           |
| ViT + t-SNE    | t-STE        | ICP      | Year    | Image + flavor | SVM  | 0.08           |
| ViT + t-SNE    | t-STE        | SNaCK    | Year    | Image + flavor | SVM  | <b>0.14</b>    |

Table 13: **ResNET**: Classification results.

| Machine Kernel | Human Kernel | Combiner | Class   | Modality       | Pred | ACC $\uparrow$ |
|----------------|--------------|----------|---------|----------------|------|----------------|
| Random         |              |          | Country |                |      | 0.13           |
| ResNET + UMAP  |              |          | Country | Image only     | SVM  | 0.10           |
| ResNET + t-SNE |              |          | Country | Image only     | SVM  | 0.13           |
| ResNET + UMAP  | MDS          | CCA      | Country | Image + flavor | SVM  | 0.23           |
| ResNET + t-SNE | MDS          | ICP      | Country | Image + flavor | SVM  | 0.17           |
| ResNET + t-SNE | MDS          | CCA      | Country | Image + flavor | SVM  | <b>0.24</b>    |
| ResNET + UMAP  | t-STE        | CCA      | Country | Image + flavor | SVM  | 0.20           |
| ResNET + t-SNE | t-STE        | ICP      | Country | Image + flavor | SVM  | 0.17           |
| ResNET + t-SNE | t-STE        | SNaCK    | Country | Image + flavor | SVM  | 0.15           |
| Random         |              |          | Region  |                |      | <b>0.02</b>    |
| ResNET + UMAP  |              |          | Region  | Image only     | SVM  | 0.00           |
| ResNET + t-SNE |              |          | Region  | Image only     | SVM  | 0.00           |
| ResNET + UMAP  | MDS          | CCA      | Region  | Image + flavor | SVM  | <b>0.02</b>    |
| ResNET + t-SNE | MDS          | ICP      | Region  | Image + flavor | SVM  | 0.01           |
| ResNET + t-SNE | MDS          | CCA      | Region  | Image + flavor | SVM  | 0.01           |
| ResNET + UMAP  | t-STE        | CCA      | Region  | Image + flavor | SVM  | 0.01           |
| ResNET + t-SNE | t-STE        | ICP      | Region  | Image + flavor | SVM  | 0.01           |
| ResNET + t-SNE | t-STE        | SNaCK    | Region  | Image + flavor | SVM  | 0.00           |
| Random         |              |          | Grape   |                |      | <b>0.03</b>    |
| ResNET + UMAP  |              |          | Grape   | Image only     | SVM  | 0.00           |
| ResNET + t-SNE |              |          | Grape   | Image only     | SVM  | 0.00           |
| ResNET + UMAP  | MDS          | CCA      | Grape   | Image + flavor | SVM  | <b>0.03</b>    |
| ResNET + t-SNE | MDS          | ICP      | Grape   | Image + flavor | SVM  | 0.00           |
| ResNET + t-SNE | MDS          | CCA      | Grape   | Image + flavor | SVM  | <b>0.03</b>    |
| ResNET + UMAP  | t-STE        | CCA      | Grape   | Image + flavor | SVM  | <b>0.03</b>    |
| ResNET + t-SNE | t-STE        | ICP      | Grape   | Image + flavor | SVM  | 0.00           |
| ResNET + t-SNE | t-STE        | SNaCK    | Grape   | Image + flavor | SVM  | 0.00           |
| Random         |              |          | Alc %   |                |      | 0.17           |
| ResNET + UMAP  |              |          | Alc %   | Image only     | SVM  | 0.16           |
| ResNET + t-SNE |              |          | Alc %   | Image only     | SVM  | 0.18           |
| ResNET + UMAP  | MDS          | CCA      | Alc %   | Image + flavor | SVM  | 0.35           |
| ResNET + t-SNE | MDS          | ICP      | Alc %   | Image + flavor | SVM  | 0.14           |
| ResNET + t-SNE | MDS          | CCA      | Alc %   | Image + flavor | SVM  | <b>0.40</b>    |
| ResNET + UMAP  | t-STE        | CCA      | Alc %   | Image + flavor | SVM  | 0.36           |
| ResNET + t-SNE | t-STE        | ICP      | Alc %   | Image + flavor | SVM  | 0.14           |
| ResNET + t-SNE | t-STE        | SNaCK    | Alc %   | Image + flavor | SVM  | 0.19           |
| Random         |              |          | Price   |                |      | 0.10           |
| ResNET + UMAP  |              |          | Price   | Image only     | SVM  | 0.29           |
| ResNET + t-SNE |              |          | Price   | Image only     | SVM  | 0.28           |
| ResNET + UMAP  | MDS          | CCA      | Price   | Image + flavor | SVM  | <b>0.30</b>    |
| ResNET + t-SNE | MDS          | ICP      | Price   | Image + flavor | SVM  | 0.29           |
| ResNET + t-SNE | MDS          | CCA      | Price   | Image + flavor | SVM  | <b>0.30</b>    |
| ResNET + UMAP  | t-STE        | CCA      | Price   | Image + flavor | SVM  | 0.29           |
| ResNET + t-SNE | t-STE        | ICP      | Price   | Image + flavor | SVM  | 0.29           |
| ResNET + t-SNE | t-STE        | SNaCK    | Price   | Image + flavor | SVM  | 0.28           |
| Random         |              |          | Rating  |                |      | 0.25           |
| ResNET + UMAP  |              |          | Rating  | Image only     | SVM  | 0.37           |
| ResNET + t-SNE |              |          | Rating  | Image only     | SVM  | 0.34           |
| ResNET + UMAP  | MDS          | CCA      | Rating  | Image + flavor | SVM  | 0.50           |
| ResNET + t-SNE | MDS          | ICP      | Rating  | Image + flavor | SVM  | 0.34           |
| ResNET + t-SNE | MDS          | CCA      | Rating  | Image + flavor | SVM  | 0.42           |
| ResNET + UMAP  | t-STE        | CCA      | Rating  | Image + flavor | SVM  | <b>0.58</b>    |
| ResNET + t-SNE | t-STE        | ICP      | Rating  | Image + flavor | SVM  | 0.34           |
| ResNET + t-SNE | t-STE        | SNaCK    | Rating  | Image + flavor | SVM  | 0.20           |
| Random         |              |          | Year    |                |      | 0.08           |
| ResNET + UMAP  |              |          | Year    | Image only     | SVM  | 0.08           |
| ResNET + t-SNE |              |          | Year    | Image only     | SVM  | 0.10           |
| ResNET + UMAP  | MDS          | CCA      | Year    | Image + flavor | SVM  | <b>0.11</b>    |
| ResNET + t-SNE | MDS          | ICP      | Year    | Image + flavor | SVM  | 0.08           |
| ResNET + t-SNE | MDS          | CCA      | Year    | Image + flavor | SVM  | 0.09           |
| ResNET + UMAP  | t-STE        | CCA      | Year    | Image + flavor | SVM  | 0.08           |
| ResNET + t-SNE | t-STE        | ICP      | Year    | Image + flavor | SVM  | 0.08           |
| ResNET + t-SNE | t-STE        | SNaCK    | Year    | Image + flavor | SVM  | 0.04           |

Table 14: **DeiT**: Classification results.

| Machine Kernel | Human Kernel | Combiner | Class   | Modality       | Pred | ACC $\uparrow$ |
|----------------|--------------|----------|---------|----------------|------|----------------|
| Random         |              |          | Country |                |      | 0.13           |
| DeiT + UMAP    |              |          | Country | Image only     | SVM  | 0.05           |
| DeiT + t-SNE   |              |          | Country | Image only     | SVM  | 0.16           |
| DeiT + UMAP    | MDS          | CCA      | Country | Image + flavor | SVM  | <b>0.29</b>    |
| DeiT + t-SNE   | MDS          | ICP      | Country | Image + flavor | SVM  | 0.12           |
| DeiT + t-SNE   | MDS          | CCA      | Country | Image + flavor | SVM  | 0.23           |
| DeiT + UMAP    | t-STE        | CCA      | Country | Image + flavor | SVM  | 0.26           |
| DeiT + t-SNE   | t-STE        | ICP      | Country | Image + flavor | SVM  | 0.13           |
| DeiT + t-SNE   | t-STE        | SNaCK    | Country | Image + flavor | SVM  | 0.12           |
| Random         |              |          | Region  |                |      | 0.02           |
| DeiT + UMAP    |              |          | Region  | Image only     | SVM  | 0.01           |
| DeiT + t-SNE   |              |          | Region  | Image only     | SVM  | 0.01           |
| DeiT + UMAP    | MDS          | CCA      | Region  | Image + flavor | SVM  | <b>0.05</b>    |
| DeiT + t-SNE   | MDS          | ICP      | Region  | Image + flavor | SVM  | 0.01           |
| DeiT + t-SNE   | MDS          | CCA      | Region  | Image + flavor | SVM  | 0.03           |
| DeiT + UMAP    | t-STE        | CCA      | Region  | Image + flavor | SVM  | 0.02           |
| DeiT + t-SNE   | t-STE        | ICP      | Region  | Image + flavor | SVM  | 0.01           |
| DeiT + t-SNE   | t-STE        | SNaCK    | Region  | Image + flavor | SVM  | 0.0            |
| Random         |              |          | Grape   |                |      | 0.03           |
| DeiT + UMAP    |              |          | Grape   | Image only     | SVM  | 0.01           |
| DeiT + t-SNE   |              |          | Grape   | Image only     | SVM  | 0.01           |
| DeiT + UMAP    | MDS          | CCA      | Grape   | Image + flavor | SVM  | <b>0.06</b>    |
| DeiT + t-SNE   | MDS          | ICP      | Grape   | Image + flavor | SVM  | 0.00           |
| DeiT + t-SNE   | MDS          | CCA      | Grape   | Image + flavor | SVM  | <b>0.06</b>    |
| DeiT + UMAP    | t-STE        | CCA      | Grape   | Image + flavor | SVM  | 0.04           |
| DeiT + t-SNE   | t-STE        | ICP      | Grape   | Image + flavor | SVM  | 0.0            |
| DeiT + t-SNE   | t-STE        | SNaCK    | Grape   | Image + flavor | SVM  | 0.02           |
| Random         |              |          | Alc %   |                |      | 0.17           |
| DeiT + UMAP    |              |          | Alc %   | Image only     | SVM  | 0.13           |
| DeiT + t-SNE   |              |          | Alc %   | Image only     | SVM  | 0.19           |
| DeiT + UMAP    | MDS          | CCA      | Alc %   | Image + flavor | SVM  | <b>0.39</b>    |
| DeiT + t-SNE   | MDS          | ICP      | Alc %   | Image + flavor | SVM  | 0.18           |
| DeiT + t-SNE   | MDS          | CCA      | Alc %   | Image + flavor | SVM  | 0.33           |
| DeiT + UMAP    | t-STE        | CCA      | Alc %   | Image + flavor | SVM  | <b>0.39</b>    |
| DeiT + t-SNE   | t-STE        | ICP      | Alc %   | Image + flavor | SVM  | 0.18           |
| DeiT + t-SNE   | t-STE        | SNaCK    | Alc %   | Image + flavor | SVM  | 0.23           |
| Random         |              |          | Price   |                |      | 0.10           |
| DeiT + UMAP    |              |          | Price   | Image only     | SVM  | 0.21           |
| DeiT + t-SNE   |              |          | Price   | Image only     | SVM  | 0.21           |
| DeiT + UMAP    | MDS          | CCA      | Price   | Image + flavor | SVM  | <b>0.38</b>    |
| DeiT + t-SNE   | MDS          | ICP      | Price   | Image + flavor | SVM  | 0.16           |
| DeiT + t-SNE   | MDS          | CCA      | Price   | Image + flavor | SVM  | <b>0.38</b>    |
| DeiT + UMAP    | t-STE        | CCA      | Price   | Image + flavor | SVM  | 0.29           |
| DeiT + t-SNE   | t-STE        | ICP      | Price   | Image + flavor | SVM  | 0.16           |
| DeiT + t-SNE   | t-STE        | SNaCK    | Price   | Image + flavor | SVM  | 0.18           |
| Random         |              |          | Rating  |                |      | 0.25           |
| DeiT + UMAP    |              |          | Rating  | Image only     | SVM  | 0.29           |
| DeiT + t-SNE   |              |          | Rating  | Image only     | SVM  | 0.31           |
| DeiT + UMAP    | MDS          | CCA      | Rating  | Image + flavor | SVM  | 0.32           |
| DeiT + t-SNE   | MDS          | ICP      | Rating  | Image + flavor | SVM  | 0.31           |
| DeiT + t-SNE   | MDS          | CCA      | Rating  | Image + flavor | SVM  | 0.44           |
| DeiT + UMAP    | t-STE        | CCA      | Rating  | Image + flavor | SVM  | <b>0.49</b>    |
| DeiT + t-SNE   | t-STE        | ICP      | Rating  | Image + flavor | SVM  | 0.30           |
| DeiT + t-SNE   | t-STE        | SNaCK    | Rating  | Image + flavor | SVM  | 0.28           |
| Random         |              |          | Year    |                |      | 0.08           |
| DeiT + UMAP    |              |          | Year    | Image only     | SVM  | 0.06           |
| DeiT + t-SNE   |              |          | Year    | Image only     | SVM  | 0.10           |
| DeiT + UMAP    | MDS          | CCA      | Year    | Image + flavor | SVM  | 0.10           |
| DeiT + t-SNE   | MDS          | ICP      | Year    | Image + flavor | SVM  | 0.14           |
| DeiT + t-SNE   | MDS          | CCA      | Year    | Image + flavor | SVM  | 0.11           |
| DeiT + UMAP    | t-STE        | CCA      | Year    | Image + flavor | SVM  | <b>0.15</b>    |
| DeiT + t-SNE   | t-STE        | ICP      | Year    | Image + flavor | SVM  | 0.14           |
| DeiT + t-SNE   | t-STE        | SNaCK    | Year    | Image + flavor | SVM  | 0.12           |

Table 15: **CLIP (Image Encoder):** Classification results.

| Machine Kernel | Human Kernel | Combiner | Class   | Modality       | Pred | ACC $\uparrow$ |
|----------------|--------------|----------|---------|----------------|------|----------------|
| Random         |              |          | Country |                |      | 0.13           |
| CLIP + UMAP    |              |          | Country | Image only     | SVM  | 0.08           |
| CLIP + t-SNE   |              |          | Country | Image only     | SVM  | 0.05           |
| CLIP + UMAP    | MDS          | CCA      | Country | Image + flavor | SVM  | 0.21           |
| CLIP + t-SNE   | MDS          | ICP      | Country | Image + flavor | SVM  | 0.08           |
| CLIP + t-SNE   | MDS          | CCA      | Country | Image + flavor | SVM  | 0.24           |
| CLIP + UMAP    | t-STE        | CCA      | Country | Image + flavor | SVM  | <b>0.57</b>    |
| CLIP + t-SNE   | t-STE        | ICP      | Country | Image + flavor | SVM  | 0.53           |
| CLIP + t-SNE   | t-STE        | SNaCK    | Country | Image + flavor | SVM  | 0.48           |
| Random         |              |          | Region  |                |      | 0.02           |
| CLIP + UMAP    |              |          | Region  | Image only     | SVM  | 0.00           |
| CLIP + t-SNE   |              |          | Region  | Image only     | SVM  | 0.00           |
| CLIP + UMAP    | MDS          | CCA      | Region  | Image + flavor | SVM  | 0.02           |
| CLIP + t-SNE   | MDS          | ICP      | Region  | Image + flavor | SVM  | 0.00           |
| CLIP + t-SNE   | MDS          | CCA      | Region  | Image + flavor | SVM  | 0.00           |
| CLIP + UMAP    | t-STE        | CCA      | Region  | Image + flavor | SVM  | <b>0.04</b>    |
| CLIP + t-SNE   | t-STE        | ICP      | Region  | Image + flavor | SVM  | 0.03           |
| CLIP + t-SNE   | t-STE        | SNaCK    | Region  | Image + flavor | SVM  | <b>0.04</b>    |
| Random         |              |          | Grape   |                |      | 0.03           |
| CLIP + UMAP    |              |          | Grape   | Image only     | SVM  | 0.00           |
| CLIP + t-SNE   |              |          | Grape   | Image only     | SVM  | 0.00           |
| CLIP + UMAP    | MDS          | CCA      | Grape   | Image + flavor | SVM  | 0.07           |
| CLIP + t-SNE   | MDS          | ICP      | Grape   | Image + flavor | SVM  | 0.00           |
| CLIP + t-SNE   | MDS          | CCA      | Grape   | Image + flavor | SVM  | 0.05           |
| CLIP + UMAP    | t-STE        | CCA      | Grape   | Image + flavor | SVM  | <b>0.15</b>    |
| CLIP + t-SNE   | t-STE        | ICP      | Grape   | Image + flavor | SVM  | 0.09           |
| CLIP + t-SNE   | t-STE        | SNaCK    | Grape   | Image + flavor | SVM  | 0.10           |
| Random         |              |          | Alc %   |                |      | 0.17           |
| CLIP + UMAP    |              |          | Alc %   | Image only     | SVM  | 0.11           |
| CLIP + t-SNE   |              |          | Alc %   | Image only     | SVM  | 0.11           |
| CLIP + UMAP    | MDS          | CCA      | Alc %   | Image + flavor | SVM  | 0.42           |
| CLIP + t-SNE   | MDS          | ICP      | Alc %   | Image + flavor | SVM  | 0.18           |
| CLIP + t-SNE   | MDS          | CCA      | Alc %   | Image + flavor | SVM  | 0.44           |
| CLIP + UMAP    | t-STE        | CCA      | Alc %   | Image + flavor | SVM  | <b>0.46</b>    |
| CLIP + t-SNE   | t-STE        | ICP      | Alc %   | Image + flavor | SVM  | 0.35           |
| CLIP + t-SNE   | t-STE        | SNaCK    | Alc %   | Image + flavor | SVM  | 0.31           |
| Random         |              |          | Price   |                |      | 0.10           |
| CLIP + UMAP    |              |          | Price   | Image only     | SVM  | 0.20           |
| CLIP + t-SNE   |              |          | Price   | Image only     | SVM  | 0.16           |
| CLIP + UMAP    | MDS          | CCA      | Price   | Image + flavor | SVM  | 0.28           |
| CLIP + t-SNE   | MDS          | ICP      | Price   | Image + flavor | SVM  | 0.20           |
| CLIP + t-SNE   | MDS          | CCA      | Price   | Image + flavor | SVM  | <b>0.30</b>    |
| CLIP + UMAP    | t-STE        | CCA      | Price   | Image + flavor | SVM  | 0.29           |
| CLIP + t-SNE   | t-STE        | ICP      | Price   | Image + flavor | SVM  | 0.09           |
| CLIP + t-SNE   | t-STE        | SNaCK    | Price   | Image + flavor | SVM  | 0.16           |
| Random         |              |          | Rating  |                |      | 0.25           |
| CLIP + UMAP    |              |          | Rating  | Image only     | SVM  | 0.15           |
| CLIP + t-SNE   |              |          | Rating  | Image only     | SVM  | 0.12           |
| CLIP + UMAP    | MDS          | CCA      | Rating  | Image + flavor | SVM  | 0.36           |
| CLIP + t-SNE   | MDS          | ICP      | Rating  | Image + flavor | SVM  | 0.20           |
| CLIP + t-SNE   | MDS          | CCA      | Rating  | Image + flavor | SVM  | 0.39           |
| CLIP + UMAP    | t-STE        | CCA      | Rating  | Image + flavor | SVM  | <b>0.47</b>    |
| CLIP + t-SNE   | t-STE        | ICP      | Rating  | Image + flavor | SVM  | 0.28           |
| CLIP + t-SNE   | t-STE        | SNaCK    | Rating  | Image + flavor | SVM  | 0.42           |
| Random         |              |          | Year    |                |      | 0.08           |
| CLIP + UMAP    |              |          | Year    | Image only     | SVM  | 0.37           |
| CLIP + t-SNE   |              |          | Year    | Image only     | SVM  | 0.30           |
| CLIP + UMAP    | MDS          | CCA      | Year    | Image + flavor | SVM  | <b>0.38</b>    |
| CLIP + t-SNE   | MDS          | ICP      | Year    | Image + flavor | SVM  | 0.29           |
| CLIP + t-SNE   | MDS          | CCA      | Year    | Image + flavor | SVM  | 0.20           |
| CLIP + UMAP    | t-STE        | CCA      | Year    | Image + flavor | SVM  | 0.12           |
| CLIP + t-SNE   | t-STE        | ICP      | Year    | Image + flavor | SVM  | 0.12           |
| CLIP + t-SNE   | t-STE        | SNaCK    | Year    | Image + flavor | SVM  | 0.11           |

Table 16: **CLIP (Image and Text Encoder):** Classification results.

| Machine Kernel | Human Kernel | Combiner | Class   | Modality              | Pred | ACC $\uparrow$ |
|----------------|--------------|----------|---------|-----------------------|------|----------------|
| Random         |              |          | Country |                       |      | 0.13           |
| CLIP + UMAP    |              |          | Country | Image + text          | SVM  | 0.38           |
| CLIP + t-SNE   |              |          | Country | Image + text          | SVM  | 0.48           |
| CLIP + UMAP    | MDS          | CCA      | Country | Image + text + flavor | SVM  | 0.44           |
| CLIP + t-SNE   | MDS          | ICP      | Country | Image + text + flavor | SVM  | <b>0.53</b>    |
| CLIP + t-SNE   | MDS          | CCA      | Country | Image + text + flavor | SVM  | 0.45           |
| CLIP + UMAP    | t-STE        | CCA      | Country | Image + text + flavor | SVM  | 0.38           |
| CLIP + t-SNE   | t-STE        | ICP      | Country | Image + text + flavor | SVM  | <b>0.53</b>    |
| CLIP + t-SNE   | t-STE        | SNaCK    | Country | Image + text + flavor | SVM  | 0.48           |
| Random         |              |          | Region  |                       |      | 0.02           |
| CLIP + UMAP    |              |          | Region  | Image + text          | SVM  | 0.06           |
| CLIP + t-SNE   |              |          | Region  | Image + text          | SVM  | 0.04           |
| CLIP + UMAP    | MDS          | CCA      | Region  | Image + text + flavor | SVM  | <b>0.07</b>    |
| CLIP + t-SNE   | MDS          | ICP      | Region  | Image + text + flavor | SVM  | 0.03           |
| CLIP + t-SNE   | MDS          | CCA      | Region  | Image + text + flavor | SVM  | 0.06           |
| CLIP + UMAP    | t-STE        | CCA      | Region  | Image + text + flavor | SVM  | 0.00           |
| CLIP + t-SNE   | t-STE        | ICP      | Region  | Image + text + flavor | SVM  | 0.03           |
| CLIP + t-SNE   | t-STE        | SNaCK    | Region  | Image + text + flavor | SVM  | 0.04           |
| Random         |              |          | Grape   |                       |      | 0.03           |
| CLIP + UMAP    |              |          | Grape   | Image + text          | SVM  | 0.07           |
| CLIP + t-SNE   |              |          | Grape   | Image + text          | SVM  | 0.10           |
| CLIP + UMAP    | MDS          | CCA      | Grape   | Image + text + flavor | SVM  | 0.06           |
| CLIP + t-SNE   | MDS          | ICP      | Grape   | Image + text + flavor | SVM  | 0.09           |
| CLIP + t-SNE   | MDS          | CCA      | Grape   | Image + text + flavor | SVM  | 0.06           |
| CLIP + UMAP    | t-STE        | CCA      | Grape   | Image + text + flavor | SVM  | 0.07           |
| CLIP + t-SNE   | t-STE        | ICP      | Grape   | Image + text + flavor | SVM  | 0.09           |
| CLIP + t-SNE   | t-STE        | SNaCK    | Grape   | Image + text + flavor | SVM  | <b>0.10</b>    |
| Random         |              |          | Alc %   |                       |      | 0.17           |
| CLIP + UMAP    |              |          | Alc %   | Image + text          | SVM  | 0.09           |
| CLIP + t-SNE   |              |          | Alc %   | Image + text          | SVM  | 0.30           |
| CLIP + UMAP    | MDS          | CCA      | Alc %   | Image + text + flavor | SVM  | <b>0.53</b>    |
| CLIP + t-SNE   | MDS          | ICP      | Alc %   | Image + text + flavor | SVM  | 0.35           |
| CLIP + t-SNE   | MDS          | CCA      | Alc %   | Image + text + flavor | SVM  | <b>0.53</b>    |
| CLIP + UMAP    | t-STE        | CCA      | Alc %   | Image + text + flavor | SVM  | 0.43           |
| CLIP + t-SNE   | t-STE        | ICP      | Alc %   | Image + text + flavor | SVM  | 0.35           |
| CLIP + t-SNE   | t-STE        | SNaCK    | Alc %   | Image + text + flavor | SVM  | 0.31           |
| Random         |              |          | Price   |                       |      | 0.10           |
| CLIP + UMAP    |              |          | Price   | Image + text          | SVM  | 0.18           |
| CLIP + t-SNE   |              |          | Price   | Image + text          | SVM  | 0.18           |
| CLIP + UMAP    | MDS          | CCA      | Price   | Image + text + flavor | SVM  | <b>0.33</b>    |
| CLIP + t-SNE   | MDS          | ICP      | Price   | Image + text + flavor | SVM  | 0.09           |
| CLIP + t-SNE   | MDS          | CCA      | Price   | Image + text + flavor | SVM  | 0.30           |
| CLIP + UMAP    | t-STE        | CCA      | Price   | Image + text + flavor | SVM  | 0.32           |
| CLIP + t-SNE   | t-STE        | ICP      | Price   | Image + text + flavor | SVM  | 0.09           |
| CLIP + t-SNE   | t-STE        | SNaCK    | Price   | Image + text + flavor | SVM  | 0.15           |
| Random         |              |          | Rating  |                       |      | 0.25           |
| CLIP + UMAP    |              |          | Rating  | Image + text          | SVM  | 0.23           |
| CLIP + t-SNE   |              |          | Rating  | Image + text          | SVM  | 0.33           |
| CLIP + UMAP    | MDS          | CCA      | Rating  | Image + text + flavor | SVM  | 0.40           |
| CLIP + t-SNE   | MDS          | ICP      | Rating  | Image + text + flavor | SVM  | 0.29           |
| CLIP + t-SNE   | MDS          | CCA      | Rating  | Image + text + flavor | SVM  | 0.42           |
| CLIP + UMAP    | t-STE        | CCA      | Rating  | Image + text + flavor | SVM  | <b>0.45</b>    |
| CLIP + t-SNE   | t-STE        | ICP      | Rating  | Image + text + flavor | SVM  | 0.29           |
| CLIP + t-SNE   | t-STE        | SNaCK    | Rating  | Image + text + flavor | SVM  | 0.42           |
| Random         |              |          | Year    |                       |      | 0.08           |
| CLIP + UMAP    |              |          | Year    | Image + text          | SVM  | 0.07           |
| CLIP + t-SNE   |              |          | Year    | Image + text          | SVM  | 0.09           |
| CLIP + UMAP    | MDS          | CCA      | Year    | Image + text + flavor | SVM  | 0.10           |
| CLIP + t-SNE   | MDS          | ICP      | Year    | Image + text + flavor | SVM  | 0.12           |
| CLIP + t-SNE   | MDS          | CCA      | Year    | Image + text + flavor | SVM  | <b>0.17</b>    |
| CLIP + UMAP    | t-STE        | CCA      | Year    | Image + text + flavor | SVM  | 0.16           |
| CLIP + t-SNE   | t-STE        | ICP      | Year    | Image + text + flavor | SVM  | 0.12           |
| CLIP + t-SNE   | t-STE        | SNaCK    | Year    | Image + text + flavor | SVM  | 0.11           |

638 **G Ethical approval**

639 The original ethical approval is shown in Figure 7 English translation of the ethical approval can be  
640 found in section G.1.

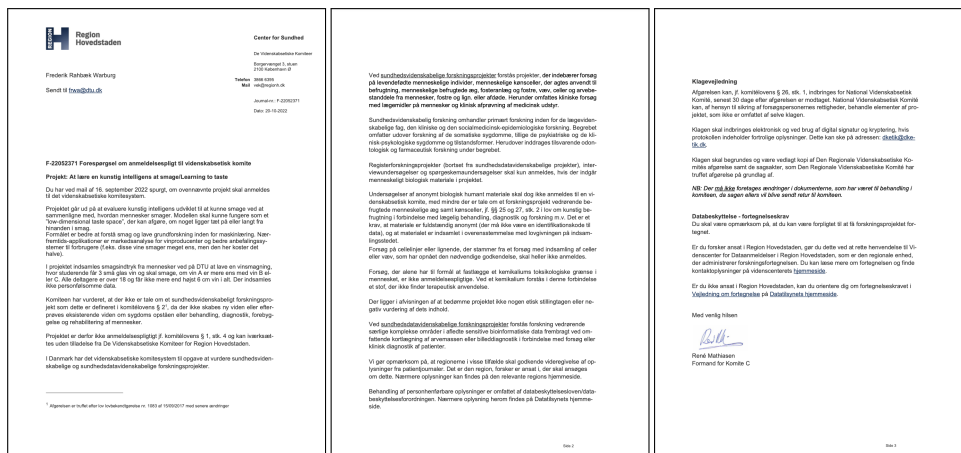

(a) Page 1

(b) Page 2

(c) Page 3

Figure 7: Ethical Approval (in Danish).

641 **G.1 English translation**

642 **F-22052371 Inquiry Regarding Reporting Obligations to the Ethical Scientific Committee**

643 **Project: Learning to Taste**

644 You have asked via email on September 16, 2022, if the above-mentioned project must be reported to  
645 the Ethical Scientific Committee. The project involves evaluating an artificial intelligence developed  
646 to mimic the human ability to taste, comparing it with the way humans experience flavors. The model  
647 should function as a "low-dimensional taste space", which can determine whether something is close  
648 to or far from each other in terms of taste.

649 The aim is to better understand taste and conduct basic research in machine learning. Near-future  
650 applications include market analysis for wine producers and improved recommendation systems for  
651 consumers (e.g., these wines taste very similar, but this one costs half as much).

652 In the project, taste impressions from humans are collected by conducting a wine tasting at DTU,  
653 where students are given three small glasses of wine to taste whether wine A is more similar to wine  
654 B or C. All participants are over 18 and receive no more than a maximum of 6 cl of wine in total. No  
655 sensitive personal data is collected.

656 The committee has assessed that this is not a health science research project as defined in the  
657 committee law's section 21, as it does not create new knowledge or test existing knowledge about  
658 disease onset or treatment, diagnostics, prevention, and rehabilitation of humans.

659 Therefore, the project is not subject to reporting according to the committee law's section 1, paragraph  
660 4 and can be implemented without permission from the Ethical Scientific Committees for the Capital  
661 Region of Denmark.

662 In Denmark, the task of the Ethical Scientific Committee system is to assess health science and health  
663 data science research projects.

664 Health science research projects refer to experiments involving live-born human individuals, human  
665 gametes intended for fertilization, human fertilized eggs, embryonic and fetal tissues, cells, and

666 hereditary components from humans, fetuses, and the like, or deceased individuals. This includes  
667 clinical trials with drugs on humans and clinical testing of medical equipment.

668 Health science research primarily covers research in the field of medical science, clinical, and  
669 social-medical epidemiological research. In addition to research on somatic diseases, the term also  
670 encompasses psychiatric and clinical-psychological diseases and conditions. Correspondingly, dental  
671 and pharmaceutical research are included under the term.

672 Registered research projects (except for health data science projects), interviews, and questionnaire  
673 surveys only need to be reported if human biological material is included in the project. However,  
674 investigations of anonymous biological human material do not need to be reported to an ethical  
675 scientific committee unless the research project relates to fertilized human eggs and sex cells, cf.  
676 sections 25 and 27, paragraph 2 in the Act on Artificial Fertilization in connection with medical  
677 treatment, diagnosis, and research. It is a requirement that the material is completely anonymous  
678 (there must not be an identification code for data), and that the material is collected in accordance  
679 with the law at the collection site.

680 Experiments on cell lines or similar originating from an experiment collecting cells or tissue, which  
681 has received the necessary approval, also do not need to be reported. Experiments that aim solely to  
682 determine a chemical's toxicological limit in humans do not need to be reported. In this context, a  
683 chemical is understood to mean a substance that does not find therapeutic use.

684 The rejection to review the project does not imply an ethical stance or negative assessment of its  
685 content.

686 Health data science research projects refer to research concerning particular complex areas of derived  
687 sensitive bio-information data produced by comprehensive mapping of the genetic mass or imaging  
688 diagnostics in connection with experiments or clinical diagnostics of patients.

689 We note that in certain cases, the regions must approve the disclosure of information from patient  
690 records. The region in which the researcher is employed must be applied to for this. More information  
691 can be found on the relevant region's website.

692 The processing of identifiable personal information is subject to the Data Protection Act/Data  
693 Protection Regulation. More information about this can be found on the Danish Data Protection  
694 Agency's website.

695 According to section 26, paragraph 1 of the Committee Act, the decision can be appealed to the  
696 National Ethical Scientific Committee no later than 30 days after the decision has been received. The  
697 National Ethical Scientific Committee may, for the sake of safeguarding the rights of the test subjects,  
698 handle aspects of the project not covered by the appeal itself.

699 Appeals must be filed electronically and using a digital signature and encryption if the protocol  
700 contains confidential information. This can be done at the address: [dketik@dke-tik.dk](mailto:dketik@dke-tik.dk).

701 The appeal must be justified and accompanied by a copy of the decision of the Regional Ethical  
702 Scientific Committee and the case documents on which the Regional Ethical Scientific Committee  
703 has made its decision.

704 **Note:** No changes should be made to the documents that have been reviewed by the committee,  
705 otherwise, the case will be returned to the committee.

#### 706 **Data Protection - Registry Requirement**

707 Please note that you may be required to register the research project.

708 If you are a researcher employed in the Capital Region, you do this by contacting the Knowledge  
709 Center for Data Reviews in the Capital Region, which is the regional unit that administers the research  
710 registry. You can read more about the registry and find contact information on the knowledge center's  
711 website.

712 If you are not employed in the Capital Region, you can learn about the registry requirement in the  
713 Guide to the Registry on the Data Inspectorate's website.

714  
715  
716

Best regards,  
René Mathiasen  
Chairman of Committee C

## 717 H Datasheet

### 718 H.1 Motivation

719 **For what purpose was the dataset created?**

720 **Answer:** The dataset was created to bridge the gap between food science and machine learning  
721 communities and introduce flavor as a modality in multimodal models.

722 **Who created the dataset (e.g., which team, research group) and on behalf of which entity (e.g.,**  
723 **company, institution, organization)?**

724 **Answer:** Eight researchers at the Technical University of Denmark, University of Copenhagen,  
725 Vivino and California Institute of Technology have created the dataset: Thoranna Bender, Simon Moe  
726 Sørensen, Alireza Kashani, Kristjan Eldjarn Hjørleifsson, Grethe Hyldig, Søren Hauberg and Frederik  
727 Warburg.

728 **Who funded the creation of the dataset?**

729 **Answer:** The dataset is funded in part by The Danish Data Science Academy (DDSA) and the  
730 Pioneer Centre for AI (DNRF grant number P1).

731 **Any other comments?**

732 **Answer:** No.

### 733 H.2 Composition

734 **What do the instances that comprise the dataset represent (e.g., documents, photos, people,**  
735 **countries)?**

736 **Answer:** Each instance is an image of a wine bottle, a review about the wine, position of the wines  
737 on napping papers and attributes (grape, country, region, alcohol %, price and rating).

738 **How many instances are there in total (of each type, if appropriate)?**

739 **Answer:** 897k images, 824k reviews of 350k vintages, around 5% of which are also associated  
740 with year, region, rating, alcohol percentage, and grape composition. In addition there are over 5k  
741 annotated pairwise flavor distances for 108 of the wines.

742 **Does the dataset contain all possible instances or is it a sample (not necessarily random) of**  
743 **instances from a larger set?**

744 **Answer:** The provided images, reviews and attributes are sampled from Vivino's database. The  
745 provided flavor annotations are provided in full for the 108 wines they exist for.

746 **What data does each instance consist of?**

747 **Answer:** The images are .jpg files, the reviews are unprocessed text, the attributes are either  
748 numerical or categorical fields and the flavor annotations are numerical x-axis and y-axis position  
749 annotations.

750 **Is there a label or target associated with each instance?**

751 **Answer:** No, but attributes can be used as targets as shown in section .

752 **Is any information missing from individual instances?**

753 **Answer:** Yes, the attributes are available for approximately 5% of the dataset and the flavor  
754 annotations are available for 108 vintages in the dataset.

755 **Are relationships between individual instances made explicit (e.g., users' movie ratings, social  
756 network links)?**

757 **Answer:** Yes, participant ID's are mappable to flavor annotations by using the values in the ses-  
758 sion\_round\_name, experiment\_round and experiment\_no fields in participants.csv and napping.csv.

759 **Are there recommended data splits (e.g., training, development/validation, testing)?**

760 **Answer:** No.

761 **Are there any errors, sources of noise, or redundancies in the dataset?**

762 **Answer:** No.

763 **Is the dataset self-contained, or does it link to or otherwise rely on external resources (e.g.,  
764 websites, tweets, other datasets)?**

765 **Answer:** The data is self-contained.

766 **Does the dataset contain data that might be considered confidential (e.g., data that is pro-  
767 tected by legal privilege or by doctor-patient confidentiality, data that includes the content of  
768 individuals' non-public communications)?**

769 **Answer:** No.

770 **Does the dataset contain data that, if viewed directly, might be offensive, insulting, threatening,  
771 or might otherwise cause anxiety?**

772 **Answer:** No.

773 **Does the dataset relate to people?**

774 **Answer:** Yes, but indirectly. Reviews, images and flavor annotations could provide some indirect  
775 information about the people annotating them (such as language used in reviews or background in  
776 images) but no attributes containing specific information about the people (such as gender, country,  
777 age etc.) exists in the dataset.

778 **Does the dataset identify any subpopulations (e.g., by age, gender)?**

779 **Answer:** No.

780 **Is it possible to identify individuals (i.e., one or more natural persons), either directly or  
781 indirectly (i.e., in combination with other data) from the dataset?**

782 **Answer:** No.

783 **Does the dataset contain data that might be considered sensitive in any way (e.g., data that  
784 reveals racial or ethnic origins, sexual orientations, religious beliefs, political opinions or  
785 union memberships, or locations; financial or health data; biometric or genetic data; forms of  
786 government identification, such as social security numbers; criminal history)?**

787 **Answer:** No.

788 **Any other comments?**

789 **Answer:** No.

### 790 H.3 Collection process

791 **How was the data associated with each instance acquired?**

792 **Answer:** The flavor data was reported by subjects using the Napping method. The images, reviews  
793 and attributes were fetched from the Vivino platform. The flavor data was verified by a human  
794 manually checking the correctness of the algorithms annotating the napping papers. The attributes

795 have been verified by a human to correctly represent the information about individual vintages  
796 available on the Vivino platform.

797 **What mechanisms or procedures were used to collect the data (e.g., hardware apparatus or**  
798 **sensor, manual human curation, software program, software API)?**

799 **Answer:** Manual human curation and information fetched from Vivino's databases.

800 **If the dataset is a sample from a larger set, what was the sampling strategy (e.g., deterministic,**  
801 **probabilistic with specific sampling probabilities)?**

802 **Answer:** Not applicable.

803 **Who was involved in the data collection process (e.g., students, crowdworkers, contractors) and**  
804 **how were they compensated (e.g., how much were crowdworkers paid)?**

805 **Answer:** Crowd-workers that volunteered their time annotated the flavor distances. Alireza Kashani  
806 provided the image- and review data on behalf of Vivino. Attributes for the wines were collected  
807 from the Vivino platform.

808 **Over what timeframe was the data collected?**

809 **Answer:** The data was collected over the timeframe of June 2022 to May 2023.

810 **Were any ethical review processes conducted (e.g., by an institutional review board)?**

811 **Answer:** Yes, the ethical approval is provided in G.

812 **Does the dataset relate to people?**

813 **Answer:** Yes.

814 **Did you collect the data from the individuals in question directly, or obtain it via third parties**  
815 **or other sources (e.g., websites)?**

816 **Answer:** Obtained from the individuals directly.

817 **Were the individuals in question notified about the data collection?**

818 **Answer:** Yes.

819 **Did the individuals in question consent to the collection and use of their data?**

820 **Answer:** Yes.

821 **If consent was obtained, were the consenting individuals provided with a mechanism to revoke**  
822 **their consent in the future or for certain uses?**

823 **Answer:** No, this was not considered necessary, as the data can not be traced back to individuals.

824 **Has an analysis of the potential impact of the dataset and its use on data subjects (e.g., a data**  
825 **protection impact analysis) been conducted?**

826 **Answer:** No.

827 **Any other comments?**

828 **Answer:** No.

#### 829 **H.4 Preprocessing/cleaning/labeling**

830 **Was any preprocessing/cleaning/labeling of the data done (e.g., discretization or bucketing,**  
831 **tokenization, part-of-speech tagging, SIFT feature extraction, removal of instances, processing**  
832 **of missing values)?**

833 **Answer:** Yes, flavor annotation sample sheets from crowd-workers were digitized, by using the  
834 Harris corner detector [Harris et al., 1988] to find the corners of the paper and a homographic  
835 projection to obtain an aligned top-down view of the paper. The images were mapped into HSV color

836 space and a threshold filter applied to find the different colored stickers that the participant used to  
837 represent the wines. Having identified the location, we provide the Euclidean pixel-wise distance  
838 between all pairs of points in the dataset.

839 **Was the “raw” data saved in addition to the preprocessed/cleaned/labeled data (e.g., to support**  
840 **unanticipated future uses)?**

841 **Answer:** No, the sample sheets themselves were deemed to contain no information in addition to  
842 the pairwise distances provided.

843 **Is the software used to preprocess/clean/label the instances available?**

844 **Answer:** Yes, the preprocessing software is available at  
845 [https://github.com/thoranna/learning\\_to\\_taste](https://github.com/thoranna/learning_to_taste).

846 **Any other comments?**

847 **Answer:** No.

## 848 H.5 Uses

849 **Has the dataset been used for any tasks already?**

850 **Answer:** Yes, the dataset has been used to classify different wines according to the attributes  
851 provided in the dataset.

852 **Is there a repository that links to any or all papers or systems that use the dataset?**

853 **Answer:** Yes, the analysis performed is available at  
854 [https://github.com/thoranna/learning\\_to\\_taste](https://github.com/thoranna/learning_to_taste).

855 **What (other) tasks could the dataset be used for?**

856 **Answer:** The dataset could be used for analyzing how similar different peoples' sense of taste is. It  
857 could also be used to identify wines that taste similar, but are available at different price points.

858 **Is there anything about the composition of the dataset or the way it was collected and prepro-**  
859 **cessed/cleaned/labeled that might impact future uses?**

860 **Answer:** Not to the authors' knowledge.

861 **Are there tasks for which the dataset should not be used?**

862 **Answer:** No.

863 **Any other comments?**

864 **Answer:** No.

## 865 H.6 Distribution

866 **Will the dataset be distributed to third parties outside of the entity (e.g., company, institution,**  
867 **organization) on behalf of which the dataset was created?**

868 **Answer:** Yes, the dataset will be freely available to everyone.

869 **How will the dataset will be distributed (e.g., tarball on website, API, GitHub)?**

870 **Answer:** Tarball on website.

871 **When will the dataset be distributed?**

872 **Answer:** The dataset is freely available as of June 12, 2023.

873 **Will the dataset be distributed under a copyright or other intellectual property (IP) license,**  
874 **and/or under applicable terms of use (ToU)?**

875 **Answer:** The dataset is available under Creative Commons Attribution 4.0 International License.

876 **Have any third parties imposed IP-based or other restrictions on the data associated with the**

877 **instances?**

878 **Answer:** No.

879 **Do any export controls or other regulatory restrictions apply to the dataset or to individual**

880 **instances?**

881 **Answer:** No.

882 **Any other comments?**

883 **Answer:** No.

884 **H.7 Maintenance**

885 **Who is supporting/hosting/maintaining the dataset? How can the owner/curator/manager of**

886 **the dataset be contacted (e.g., email address)?**

887 **Answer:** The maintainer of the dataset is Frederik Warburg (frewar1905@gmail.com)

888 **Is there an erratum?**

889 **Answer:** No.

890 **Will the dataset be updated (e.g., to correct labeling errors, add new instances, delete instances)?**

891 **Answer:** No.

892 **If the dataset relates to people, are there applicable limits on the retention of the data associated**

893 **with the instances (e.g., were individuals in question told that their data would be retained for a**

894 **fixed period of time and then deleted)?**

895 **Answer:** No.

896 **Will older versions of the dataset continue to be supported/hosted/maintained?**

897 **Answer:** Yes.

898 **If others want to extend/augment/build on/contribute to the dataset, is there a mechanism for**

899 **them to do so?**

900 **Answer:** No, this will be resolved on a case-by-case basis, as the nature of the dataset requires data

901 **collection events for expansion.**

902 **Any other comments?**

903 **Answer:** No.
